# Supplementary material for: Local atomic environment of Yb3+ in alkaline-earth fluorohalide nanocrystals
Source: Royal Society of Chemistry journal article supplement (doi:10.1039/d2ce00636g), 2022-01-01
Supplement: d2ce00636g1.pdf [file d2ce00636g1.pdf]

## ELECTRONIC SUPPLEMENTARY INFORMATION

### Local Atomic Environment of Yb<sup>3+</sup> in Alkaline-Earth Fluorohalide Nanocrystals

Dinesh K. Amarasinghe, K. Tauni Dissanayake, B. Dulani Dhanapala, and  
Federico A. Rabuffetti\*

Department of Chemistry, Wayne State University, Detroit, MI 48202, USA

\*Corresponding author. Email: [far@chem.wayne.edu](mailto:far@chem.wayne.edu)

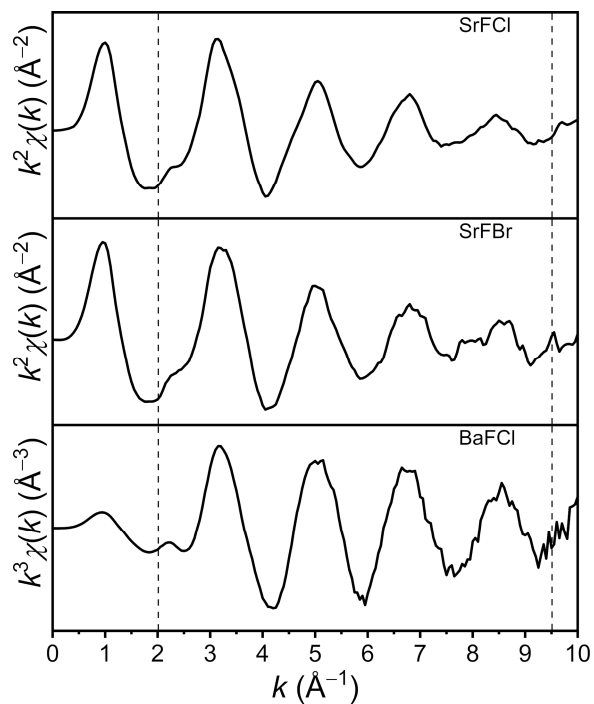

**Figure S1.**  $k^2$ - and  $k^3$ -weighted  $\chi(k)$  functions of Yb:Er:SrFX and Yb:Er:BaFCl nanocrystals, respectively.  $k$  range for the Fourier transform is indicated with vertical dashed lines.

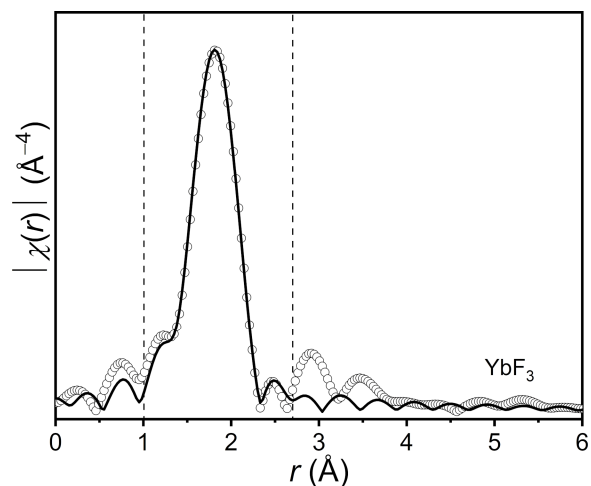

**Figure S2.** Fit of an  $\text{YbF}_9$  monometallic cluster to the radial structure function of bulk  $\text{YbF}_3$ . Experimental (hollow circles) and calculated functions (solid lines) are shown.  $\chi(r)$  was fit in  $1.0\text{--}2.7 \text{ \AA}$   $r$  range (depicted with vertical dashed lines).

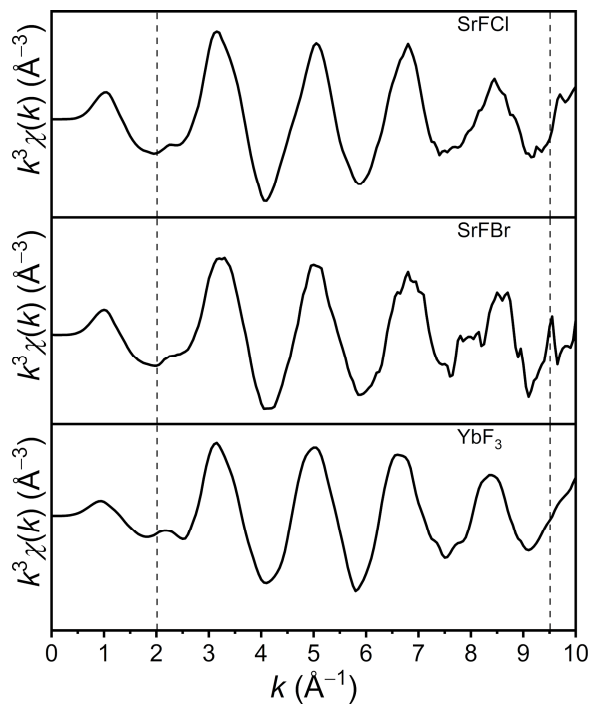

**Figure S3.**  $k^3$ -weighted  $\chi(k)$  functions of  $\text{Yb:Er:SrFX}$  and  $\text{Yb:Er:BaFCl}$  nanocrystals.  $k$  range for the Fourier transform is indicated with vertical dashed lines.
